# Supplementary material for: Risk factors for eight common cancers revealed from a phenome-wide Mendelian randomisation analysis of 378,142 cases and 485,715 controls
Source: PubMed Central journal article supplement (PMC10104236; doi:10.1101/2023.02.15.23285952), 2023-04-06
Supplement: NIHPP2023.02.15.23285952v2-supplement-1.pdf [file NIHPP2023.02.15.23285952v2-supplement-1.pdf]

## **SUPPLEMENTARY TABLES LEGENDS**

**Supplementary Table 1. List of traits examined in the Mendelian randomisation analysis and estimate of power for each trait and cancer type.**

**Supplementary Table 2. Effect allele, frequency, effect on trait and strength of association with each cancer type for SNPs used as instrumental variables.**

**Supplementary Table 3. Causal estimates from the Mendelian randomisation analysis for continuous traits and cancer risk.**

**Supplementary Table 4. Causal estimates from the Mendelian randomisation analysis for continuous traits and breast cancer subtype.**

**Supplementary Table 5. Causal estimates from the Mendelian randomisation analysis for continuous traits and lung cancer subtype.**

**Supplementary Table 6. Causal estimates from the Mendelian randomisation analysis for continuous traits and ovarian cancer subtype.**

**Supplementary Table 7. Weighted median estimate and mode-based estimates for each trait and cancer type.**

**Supplementary Table 8. MR-Egger regression analysis for each trait and cancer type.**

**Supplementary Table 9. MR Steiger analysis for each continuous trait and cancer type.**

**Supplementary Table 10. Lifetime risk of each cancer used to calculate the proportion of variance explained.**

**Supplementary Table 11. Leave one out inverse variance weighted random-effects MR analysis for each exposure trait and cancer type.**

**Supplementary Table 12. The hierarchical levels of statistical support used to classify associations.**

**Supplementary Table 13. Causal estimates for each Mendelian randomisation method for each binary trait and cancer risk.**

**Supplementary Table 14. Causal estimates for each Mendelian randomisation method for each binary trait and breast cancer subtype.**

**Supplementary Table 15. Causal estimates for each Mendelian randomisation method for each binary trait and lung cancer subtype.**

**Supplementary Table 16. Causal estimates for each Mendelian randomisation method for each binary trait and ovarian cancer subtype.**

**Supplementary Table 17. Details of filtering applied to instrumental variables used in the Mendelian randomisation analysis.**

**Supplementary Table 18. Literature triples identified across eight different cancer types and Mendelian randomisation defined risk factors using SemMedDB.**

**Supplementary Table 19. Stratification of literature space size by trait category.**

**Supplementary Table 20. List of potential mediators for each trait identified using SemMedDB.**
